# Supplementary material
Source: Springer Nature journal article supplement (https://www.springermedizin.de/resource/supplementary/12879_2012_2262_MOESM4_ESM.pdf/9443738)

28°C

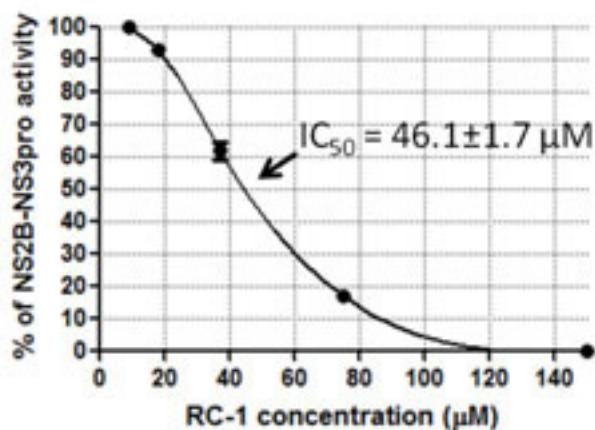

37°C

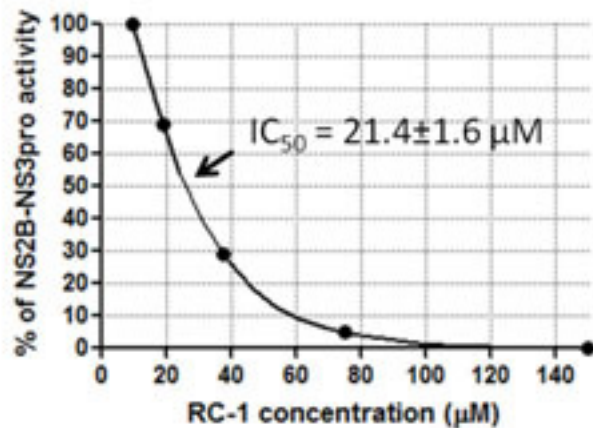

40°C

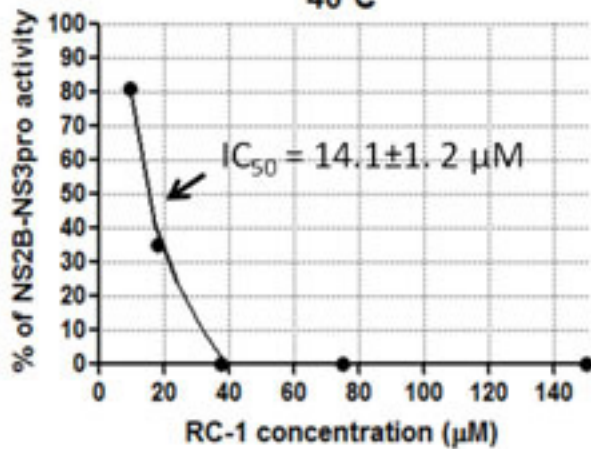

Supplement: MOESM4 [file 9443738]
